# Supplementary material
Source: ML conference proceedings conference paper supplement (https://openreview.net/forum?id=0tpZgkAKVjB)
Supplement: supplementary_material [file attachment]

## Checklist

1. For all authors...
  - (a) Do the main claims made in the abstract and introduction accurately reflect the paper’s contributions and scope? [Yes]
  - (b) Did you describe the limitations of your work? [Yes] **We include in Section 7 a discussion on open problems.**
  - (c) Did you discuss any potential negative societal impacts of your work? [No]
  - (d) Have you read the ethics review guidelines and ensured that your paper conforms to them? [Yes]
2. If you are including theoretical results...
  - (a) Did you state the full set of assumptions of all theoretical results? [Yes]
  - (b) Did you include complete proofs of all theoretical results? [Yes]
3. If you ran experiments...
  - (a) Did you include the code, data, and instructions needed to reproduce the main experimental results (either in the supplemental material or as a URL)? [Yes]
  - (b) Did you specify all the training details (e.g., data splits, hyperparameters, how they were chosen)? [Yes]
  - (c) Did you report error bars (e.g., with respect to the random seed after running experiments multiple times)? [Yes]
  - (d) Did you include the total amount of compute and the type of resources used (e.g., type of GPUs, internal cluster, or cloud provider)? [Yes]
4. If you are using existing assets (e.g., code, data, models) or curating/releasing new assets... **We do not use any existing assets.**
5. If you used crowdsourcing or conducted research with human subjects... **We did not use crowdsourcing or human subjects.**

## A Saddle-Point Computation in Multiscale Games

One application of online learning is computing approximate mixed-strategy Nash equilibria in finite two-player zero-sum games (and more generally, to approximate saddle points of convex-concave functions). Here, we investigate a multiscale version of that problem. Our main focus is to find methods whose performance does not depend on the *maximum scale*, but on the *relevant scale* to the problem instance at hand. In this case, this means the scale of the payoffs in the subset of rows and columns in the support of the Nash equilibrium. In Section A.1 we lay out the setup of two-player zero-sum finite games. In Section A.2 we define the suboptimality gap, the main measure of performance in judging the solution to these games. In Section A.3 we define the payoff matrices used in the experiments that produced Figure 4. We conjecture that MUSCADA achieves fast scale-dependent convergence in Section A.5 and provide the additional details of the experiments that produced Figure 4(right) in Section A.6.

### A.1 Two-player zero-sum finite games

Given a payoff matrix  $A \in \mathbb{R}^{K \times M}$  (specifying losses for the row player and gains for the column player) we are looking for the mixed-strategy saddle point  $(\mathbf{p}_*, \mathbf{q}_*) \in \mathcal{P}(K) \times \mathcal{P}(M)$  such that

$$\min_i \mathbf{e}_i^\top A \mathbf{q}_* \geq \max_j \mathbf{p}_*^\top A \mathbf{e}_j.$$

Our approach will be based on oracle access to the matrix-vector products  $\mathbf{q} \mapsto A\mathbf{q}$  and  $\mathbf{p} \mapsto A^\top \mathbf{p}$ . We will use the scheme of running two online learners against each other, with loss vectors  $\ell_t^{\text{row}} = A\mathbf{q}_t$  and  $\ell_t^{\text{col}} = -A^\top \mathbf{p}_t$  and optimistic estimates given by the past loss vector  $\mathbf{m}_t^{\text{row/col}} = \ell_{t-1}^{\text{row/col}}$ . For the same-scale case, Rakhlin and Sridharan [2013] show that uncoupled adaptive schemes benefit from convergence of the gap of the pair of iterate averages at rate  $O(\sigma_{\max} \frac{\ln K + \ln M}{T})$ , while recently Hsieh et al. [2021] showed last iterate convergence as well. Here we investigate the advantage of using adaptive multiscale learners to improve the dependence in  $\sigma_{\max}$ .

## A.2 The metric of success: suboptimality gap

We are looking for the equilibrium in mixed strategies, i.e.  $\min_{\mathbf{p}} \max_{\mathbf{q}} \mathbf{p}^\top A \mathbf{q}$ . The social exploitability of a candidate saddle point pair  $\mathbf{p}, \mathbf{q}$  is defined as the gap

$$\text{gap}(\mathbf{p}, \mathbf{q}) = \max_j \mathbf{p}^\top A \mathbf{e}_j - \min_i \mathbf{e}_i^\top A \mathbf{q}.$$

We use the common technique of employing online learning with linear loss functions  $\mathbf{p} \mapsto A \mathbf{q}_t$  and  $\mathbf{q} \mapsto -A^\top \mathbf{p}_t$ . A standard analysis [Freund and Schapire, 1997] bounds the gap of the iterate averages  $\bar{\mathbf{p}}_t = \frac{1}{t} \sum_{s \leq t} \mathbf{p}_s$  and  $\bar{\mathbf{q}}_t = \frac{1}{t} \sum_{s \leq t} \mathbf{q}_s$  from above by the social (sum-of) regret

$$\begin{aligned} \text{gap}(\bar{\mathbf{p}}_t, \bar{\mathbf{q}}_t) &= \max_j \bar{\mathbf{p}}_t^\top A \mathbf{e}_j - \min_i \mathbf{e}_i^\top A \bar{\mathbf{q}}_t = \frac{1}{t} \left( \max_j \sum_{s \leq t} \mathbf{p}_s^\top A \mathbf{e}_j - \min_i \sum_{s \leq t} \mathbf{e}_i^\top A \mathbf{q}_s \right) \\ &= \frac{1}{t} \max_{i,j} \left( \underbrace{\sum_{s \leq t} \mathbf{p}_s^\top A \mathbf{e}_j}_{R_t^{\mathbf{q}}(j)} - \underbrace{\sum_{s \leq t} \mathbf{p}_s^\top A \mathbf{p}_s}_{R_t^{\mathbf{p}}(i)} + \sum_{s \leq t} \mathbf{p}_s^\top A \mathbf{p}_s - \sum_{s \leq t} \mathbf{e}_i^\top A \mathbf{q}_s \right). \end{aligned}$$

Having multiscale regret bounds at our disposal, it is natural to look at multiscale payoff matrices.

## A.3 Multiscale structure

We will assume that our payoff matrix is multiscale in the sense that we are given row and column range vectors  $\sigma^{\text{row}}$  and  $\sigma^{\text{col}}$  such that  $|A_{ij}| \leq \min\{\sigma_i^{\text{row}}, \sigma_j^{\text{col}}\}$ . The main point is to learn the saddle point faster if the maximum range is much larger than the range in the support of the saddle point, i.e.  $\sigma_{\max}^{\text{row}} \gg \sigma_{\text{real}}^{\text{row}} := \max\{\sigma_i^{\text{row}} \mid \mathbf{e}_i^\top \mathbf{p}_* > 0\}$  and/or  $\sigma_{\max}^{\text{col}} \gg \sigma_{\text{real}}^{\text{col}} := \max\{\sigma_j^{\text{col}} \mid \mathbf{e}_j^\top \mathbf{q}_* > 0\}$ . We will denote that largest relevant scale by  $\sigma_{\text{real}} = \max\{\sigma_{\text{real}}^{\text{row}}, \sigma_{\text{real}}^{\text{col}}\}$ . Our aim is to get gap bounds that scale with  $\sigma_{\text{real}}$ , not  $\sigma_{\max}$ .

**Example A.1** (Simple multiscale Game). For the purpose of our experiment, we will construct our multiscale payoff matrices following the template

$$A = \begin{bmatrix} B & -\mathbf{1}\mathbf{1}^\top \\ \mathbf{1}\mathbf{1}^\top & C \end{bmatrix}$$

where  $B_{ij}$  are i.i.d. Rademacher  $\{\pm 1\}$  and  $C_{ij}$  are i.i.d. Rademacher  $\{\pm \sigma_{\max}\}$  for some pre-specified  $\sigma_{\max} \gg 1$ . By construction, any saddle point for the submatrix  $B$  is (upon padding with zeros) also a saddle point for the full matrix  $A$ . Moreover, it is a strict saddle point for  $A$  if it is a strict saddle point for  $B$  with value  $\min_{\mathbf{p}} \max_{\mathbf{q}} \mathbf{p}^\top B \mathbf{q} \in (\pm 1)$ . We will assume throughout that we are in this latter strict case. Here  $\sigma_{\text{real}} = 1$  regardless of  $\sigma_{\max}$ .

## A.4 What can one hope to achieve?

Throughout the remainder we assume for simplicity that the saddle point  $\mathbf{p}_*, \mathbf{q}_*$  of the payoff matrix  $A$  is unique (a common situation). We define the *optimality gap* of row  $i$  by  $\delta^{\text{row}}(i) = (\mathbf{e}_i - \mathbf{p}_*)^\top A \mathbf{q}_* \geq 0$  and of column  $j$  by  $\delta^{\text{col}}(j) = \mathbf{p}_*^\top A (\mathbf{q}_* - \mathbf{e}_j) \geq 0$ . We are interested in scenarios where at least one player has strictly positive optimality gap on the action(s) of largest scale. We will show that multiscale regret bounds allow the learning to accelerate. Moreover, the learner does not need to know about this structure and will adapt automatically.

Let us assume without loss of generality that  $\delta^{\text{row}}(k) > 0$  while  $\sigma_k^{\text{row}} = \max_i \sigma_i^{\text{row}}$  where  $\sigma_i^{\text{row}} = \max_j |A_{ij}|$ . The general idea now is to use that  $\bar{\mathbf{p}}_T \rightarrow \mathbf{p}_*$ . This means that from some point  $t$  on,

$$\max_j \bar{\mathbf{p}}_t^\top A \mathbf{e}_j = \max_{j: \mathbf{q}_*(j) > 0} \bar{\mathbf{p}}_t^\top A \mathbf{e}_j = \frac{1}{t} \max_{j: \mathbf{q}_*(j) > 0} \sum_{s \leq t} \mathbf{p}_s^\top A \mathbf{e}_j \leq \frac{1}{t} \sum_{s \leq t} \mathbf{p}_s^\top A \mathbf{q}_s + \max_{j: \mathbf{q}_*(j) > 0} \frac{1}{t} R_t^{\text{col}}(j)$$

A similar argument for the row player then allows us to conclude

$$\begin{aligned} \text{gap}(\bar{\mathbf{p}}_t, \bar{\mathbf{q}}_t) &\leq \frac{1}{t} \left( \sum_{s \leq t} \mathbf{p}_s^\top A \mathbf{q}_s + \max_{j: \mathbf{q}_*(j) > 0} R_t^{\text{col}}(j) - \sum_{s \leq t} \mathbf{p}_s^\top A \mathbf{q}_s + \max_{i: \mathbf{p}_*(i) > 0} R_t^{\text{row}}(i) \right) \\ &= \frac{1}{t} \left( \max_{j: \mathbf{q}_*(j) > 0} R_t^{\text{col}}(j) + \max_{i: \mathbf{p}_*(i) > 0} R_t^{\text{row}}(i) \right). \end{aligned}$$

The main point is that this bound scales with  $\max_{i:p_*(i)>0} \sigma_i^{\text{row}} + \max_{j:q_*(j)>0} \sigma_j^{\text{col}}$  and not with the respective unconstrained maxima.

**Proposition A.2.** *Any pair of multiscale online learning algorithms with bounds of order  $R_t^i \leq O(\sigma_i \sqrt{T})$ , including MUSCADA with Tuning 3 (see Lemma B.1), ensures iterate average gap*

$$\text{gap}(\bar{p}_t, \bar{q}_t) = O(\sigma_{\text{real}}/\sqrt{t})$$

as  $t \rightarrow \infty$ .

Note that same-scale algorithms would only deliver the weaker guarantee  $O(\sigma_{\text{max}}/\sqrt{t})$ .

### A.5 Why our approach may achieve the hope optimistically

Rakhlin and Sridharan [2013] show that using optimism in saddle point interactions can improve the rate to  $O(\sigma_{\text{max}}/t)$ . We first show that this is true for MUSCADA as well, after which we will investigate achieving  $O(\sigma_{\text{real}}/t)$ . The mechanism for this proof is to show that the social regret is constant. Technically, one would explicitly keep track of the slack in (17) and (18), and use these harvested slacks to cancel the  $\sqrt{t}$  term of the regret bound. Only the constant-order term measuring the entropy of the initial weights remains. For this to be a constant, we further need that the learning rate stops decreasing once the regret stabilizes. Following exactly the steps of Rakhlin and Sridharan [2013], we can prove the following proposition.

**Proposition A.3.** *For same-scale games, the optimistic version (see Figure 3) of MUSCADA with Tuning 3 and uniform prior (see Lemma B.1) achieves average iterate gap  $\text{gap}(\bar{p}_t, \bar{q}_t) = O(\sigma_{\text{max}}/t)$  as  $t \rightarrow \infty$ .*

The same-scale assumption makes all  $\sigma$  equal, while the uniform-prior assumption in addition makes all  $\eta$  equal. This makes the standard argument from the literature apply.

We further forward the natural conjecture that we state next.

**Conjecture A.4.** *For the multiscale case, the optimistic version (see Figure 3) of MUSCADA with Tuning 3 and any nondegenerate prior (see Lemma B.1) achieves average iterate gap bounded by  $\text{gap}(\bar{p}_t, \bar{q}_t) = O(\sigma_{\text{real}}/t)$ .*

The reason that our Tuning 3 has any chance here is that *no* terms (not even the additive constant) in the regret bound scale with  $\sigma_{\text{max}}$ . This in contrast to the algorithms of Foster et al. [2017], Cutkosky and Orabona [2018], Bubeck et al. [2019], Chen et al. [2021], whose existing multiscale analyses all result in a lower-order term scaling with  $\sigma_{\text{max}}$ .<sup>2</sup> We next provide empirical support for our conjecture.

### A.6 Numerical results

We investigate three algorithms: Hedge with classic time-decreasing learning rate  $\eta_t = \sqrt{\frac{\ln(K)}{\sigma_{\text{max}}^2 t}}$ , MUSCADA with all scales set to  $\sigma_{\text{max}}$  and MUSCADA with actual knowledge of the multiscale vectors. All algorithms are run in optimistic mode with guesses  $\mathbf{m}_t = \ell_{t-1}$ , the loss vector of the previous round (and  $\mathbf{m}_{1,k} = 0$ ). We choose a matrix of structure given in Example A.1, with  $B$  and  $C$  of size  $10 \times 10$ , and pick  $\sigma_{\text{max}} = 100$ . We give all algorithms the uniform prior  $\pi_k = 1/20$ . The results are displayed in Figure 5, where we show the saddle point gap for the average iterate, the last iterate and the theoretical regret bounds that we obtain from the analysis. In the main text, Figure 4(right) shows only the saddle point gap for the average iterate of optimistic MUSCADA with the optimistic modification of Tuning 3 from Figure 6. Generating this figure with the code from the supplementary material takes 30 minutes on an Intel i7-7700 processor. Memory usage is negligible.

We see in Figure 5 that the gap of optimistic Hedge decays at the slow rate  $O(\sigma_{\text{max}}/\sqrt{t})$ . This means that optimism alone is insufficient to obtain a faster  $O(\sigma_{\text{max}}/t)$  convergence rate; it is also necessary that the learning rates stop decreasing when the regret plateaus. It is also apparent that MUSCADA tuned to  $\sigma_{\text{max}}$  has the fast  $O(1/t)$  rate, but at the  $\sigma_{\text{max}}$  scale. Finally, the numerical experiments show evidence that our multiscale algorithm does exploit the small scale of the actions in the support of the saddle point, exhibiting the desired  $O(\sigma_{\text{real}}/t)$  regret conjectured above. The plot also includes the quality of the last iterate. Hsieh et al. [2021] prove convergence of the last iterate for the common

<sup>2</sup>Which is hard to spot in some of the literature because of a global  $\sigma_{\text{max}} = 1$  convention.

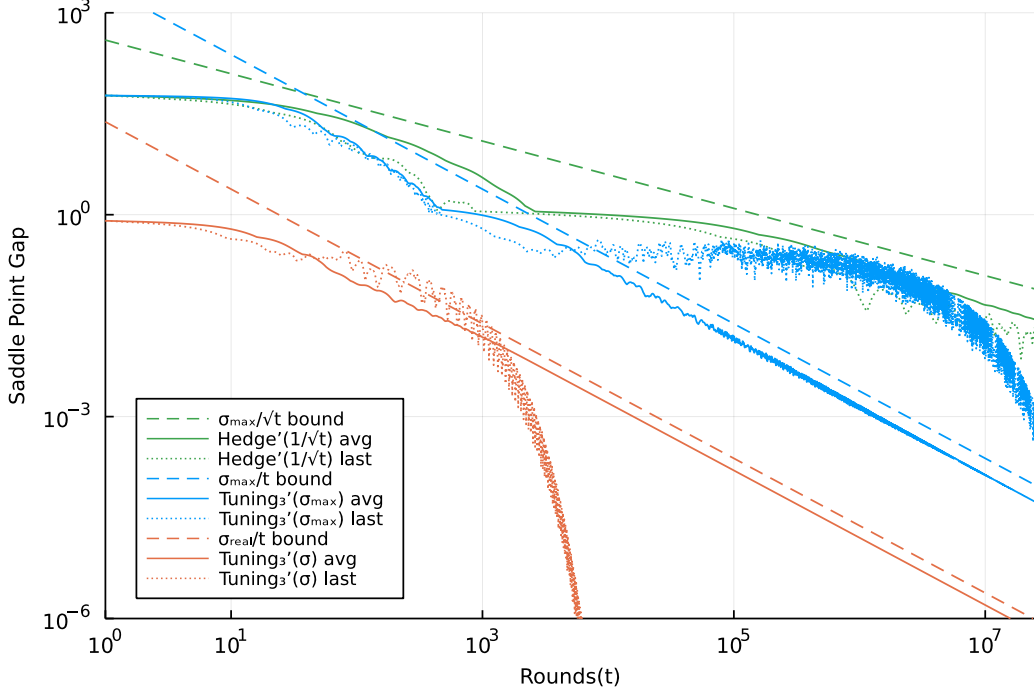

Figure 5: Quality of average iterate (solid) and last iterate (dotted) for three optimistic algorithms, compared to their relevant bounds (dashed). The multiscale-aware algorithm (red) outperforms the non-scale-aware competitors by the factor  $\sigma_{\max}/\sigma_{\text{real}} = 100$ . See Section A.6 for further discussion.

**Tuning 3**  $u = \pi \frac{\sigma_{\min}}{\sigma_k}, \eta_{0,k} = \frac{1}{2\sigma_k}, \gamma = 8 \ln(1/u_k)$ , and

$$H_{1,k}(v_t) = \frac{d}{dv_t} \left[ \frac{v_t}{\sqrt{1 + v_t/\gamma_k}} \right] = \frac{v_t/\gamma_k + 2}{2(1 + v_t/\gamma_k)^{3/2}}.$$

Figure 6: Tuning 3 for MUSCADA

scale, common prior case. In our experiment the iterate average can be seen to converge quickly in the multiscale case, but convergence is terribly slow in the same-scale case. This is not inconsistent; no rates are currently known for the last iterate.

## B Tuning 3

In this section we describe a third tuning, defined in Figure 6. In contrast to Tunings 1 and 2, the learning rates in Tuning 3 start *higher*, namely at  $1/(2\sigma_k)$  instead of  $1/(2\sigma_{\max})$ . The downside of this aggressive tuning is that the variance bound is not available (though the weaker, uncentered second-moment analog is). The upside is that the resulting regret bound compared to expert  $k$  features only  $\sigma_k$  and has *no* occurrence of  $\sigma_{\max}$  whatsoever, not even in the additive constants.

**Lemma B.1.** Let  $\pi$  be a probability distribution on  $K$  experts. MUSCADA run with Tuning 3 depicted in Figure 6 guarantees that, for any  $t = 1, 2, \dots$ ,

$$R_{t,k} \leq 2\sigma_k \sqrt{2v_t \ln(1/u_k)} + c_{\sigma,\pi} \sigma_{\min} \sqrt{2v_t} + 8\sigma_k \ln(1/u_k) + 4\sigma_{\min} + \frac{\sigma_k}{2} \max_{s \leq t} \Delta v_s, \quad (13)$$

where  $c_{\sigma, \pi} = \sum_{k \in K} \pi_k (1/\sqrt{\ln(1/u_k)})$  and  $u_k = \pi_k \frac{\sigma_{\min}}{\sigma_k}$ . Additionally,  $v_t \leq 4 \sum_{s \leq t} \frac{\langle \tilde{w}_s, \ell_s^2 \rangle}{\langle \tilde{w}_s, \sigma^2 \rangle} \leq 4t$ , where, for each  $t = 1, 2, \dots$ , the weights are  $\tilde{w}_{t,k} \propto w_{t,k} \eta_{t-1,k}$ .

*Proof.* Follow the same steps as in the proof of the regret bound for Tuning 1 in Lemma 2.3. Obtain that

$$\mu_{t,k} \leq \sigma_k \sqrt{2v_t \ln(1/u_k)} + 4\sigma_k \ln(1/u_k) \quad (14)$$

$$\frac{\ln(1/u_k)}{\eta_{t,k}} \leq \sigma_k \sqrt{2v_t \ln(1/u_k)} + 4\sigma_k \ln(1/u_k), \text{ and} \quad (15)$$

$$\sum_{k \in K} \frac{u_k}{\eta_k} \leq c_{\sigma, \pi} \sigma_{\min} \sqrt{2v_t} + 4\sigma_{\min} \quad (16)$$

with  $c_{\sigma, \pi} = \sum_{k \in K} \pi_k \left( \frac{1}{\sqrt{\ln(1/u_k)}} \right)$ . Use Proposition 2.3 to conclude the first claim. For the additional claim, use Lemma G.2 with  $\lambda = 0$ .  $\square$

## C Algorithm Analysis

The only step in the algorithm that may be problematic is the definition of  $\Delta v_t$  at every round, which one might think can take infinite values. We show in Proposition G.1 that this is not the case and that consequently  $t \mapsto v_t$  is well defined.

### C.1 Untuned regret bound, proof of Proposition 2.2

We prove that the potential  $t \mapsto \Phi_t$  is decreasing for optimistic MUSCADA. The result for the nonoptimistic version follows by setting the guesses  $\mathbf{m}_t$  to  $\mathbf{0}$ . Recall from (4) in Section 2 that the potential  $\Phi_t$  is defined by

$$\Phi_t = \Phi(\mathbf{R}_t - \boldsymbol{\mu}_t, \boldsymbol{\eta}_t) = \max_{\mathbf{w} \in \mathcal{P}(K)} \langle \mathbf{w}, \mathbf{R}_t - \boldsymbol{\mu}_t \rangle - D_{\boldsymbol{\eta}_t}(\mathbf{w}, \mathbf{u}).$$

*Proof of Lemma 2.1.* We prove the result in the optimistic case. The nonoptimistic case is recovered for  $\mathbf{m}_t = \mathbf{0}$  and replacing  $4\sigma_k^2$ , which is a bound on  $|m_{t,k} - \ell_{t,k}|^2$ , by  $\sigma_k^2$ , which bounds  $|\ell_{t,k}|^2$ . The result is a consequence of the following inequalities:

$$\begin{aligned} \Phi_t &\leq \Phi(\mathbf{R}_t - \boldsymbol{\mu}_t, \boldsymbol{\eta}_{t-1}) && \boldsymbol{\eta} \mapsto D_{\boldsymbol{\eta}} \text{ decr.} && (17) \\ &= \Phi(\mathbf{R}_t - \boldsymbol{\mu}_{t-1} - 4\boldsymbol{\eta}_{t-1} \sigma^2 \Delta v_t, \boldsymbol{\eta}_{t-1}) && \text{by def. of } \boldsymbol{\mu}_t \\ &= \Phi(\mathbf{R}_{t-1} + \langle \mathbf{w}_t, \boldsymbol{\mu}_t \rangle - \mathbf{m}_t - \boldsymbol{\mu}_{t-1}, \boldsymbol{\eta}_{t-1}) && \text{by def. of } \Delta v_t \\ &= \max_{\mathbf{w} \in \mathcal{P}(K)} \langle \mathbf{w}, \mathbf{R}_{t-1} + \langle \mathbf{w}_t, \mathbf{m}_t \rangle - \mathbf{m}_t - \boldsymbol{\mu}_{t-1} \rangle - D_{\boldsymbol{\eta}_{t-1}}(\mathbf{w}, \mathbf{u}) && \text{by def. of } \Phi \\ &= \langle \mathbf{w}_t, \mathbf{R}_{t-1} + \langle \mathbf{w}_t, \mathbf{m}_t \rangle - \mathbf{m}_t - \boldsymbol{\mu}_{t-1} \rangle - D_{\boldsymbol{\eta}_{t-1}}(\mathbf{w}_t, \mathbf{u}) && \text{by def. of } \mathbf{w}_t \\ &= \langle \mathbf{w}_t, \mathbf{R}_{t-1} - \boldsymbol{\mu}_{t-1} \rangle - D_{\boldsymbol{\eta}_{t-1}}(\mathbf{w}_t, \mathbf{u}) && \langle \mathbf{w}_t, \mathbf{m}_t \rangle \text{ cancels} \\ &\leq \max_{\mathbf{w} \in \mathcal{P}(K)} \langle \mathbf{w}, \mathbf{R}_{t-1} - \boldsymbol{\mu}_{t-1} \rangle - D_{\boldsymbol{\eta}_{t-1}}(\mathbf{w}, \mathbf{u}) && \text{since } \mathbf{w}_t \in \mathcal{P}(K) && (18) \\ &= \Phi(\mathbf{R}_{t-1} - \boldsymbol{\mu}_{t-1}, \boldsymbol{\eta}_{t-1}) = \Phi_{t-1} && \text{by def. of } \Phi, \Phi_t. \end{aligned}$$

Hence,  $\Phi_t \leq \Phi_{t-1}$ , as we were to show.  $\square$

*Proof of Proposition 2.2.* Lemma 2.1 shows that the potential  $t \mapsto \Phi(\mathbf{R}_t - \boldsymbol{\mu}_t, \boldsymbol{\eta}_t)$  is decreasing in  $t$  and that consequently  $\Phi(\mathbf{R}_t - \boldsymbol{\mu}_t, \boldsymbol{\eta}_t) \leq \Phi(\mathbf{R}_0 - \boldsymbol{\mu}_0, \boldsymbol{\eta}_0) = -D_{\boldsymbol{\eta}_0}(\mathbf{w}_1, \mathbf{u})$ . The maximal nature of the definition of  $\Phi$  implies that, for any probability distribution  $\mathbf{p} \in \mathcal{P}(K)$ ,

$$\langle \mathbf{p}, \mathbf{R}_t \rangle \leq \langle \mathbf{p}, \boldsymbol{\mu}_t \rangle + D_{\boldsymbol{\eta}_t}(\mathbf{p}, \mathbf{u}) - D_{\boldsymbol{\eta}_0}(\mathbf{w}_1, \mathbf{u}). \quad (19)$$

The second claim contained in (8) follows from the special case where  $\mathbf{p} = \boldsymbol{\delta}_k$ , the probability distribution that puts all of its mass on expert  $k$ , and by bounding the last term in (19) by zero. The last statement contained in (9) is proven in Lemma F.3. This is all that we had set ourselves to prove.  $\square$

## C.2 Tuning, proof of Proposition 2.3

*Proof of Proposition 2.3.* The main tool that is employed here to derive the regret bounds is Proposition 2.2. The fact that the learning rates at hand are decreasing is a consequence of Lemma F.4; we give more details in the following. A slightly stronger result than what we claim could be obtained by replacing directly the learning rates in Proposition 2.2. However, the result is not amenable to an easy interpretation, and we use upper bounds on the learning rates and their reciprocals. Recall that  $\gamma_k = 8 \frac{\sigma_{\max}^2}{\sigma_k^2} \ln(1/u_k)$ . The learning rate is of the form  $\eta_{t,k} = \eta_{0,k} H_{1,k}(v_t) = \eta_{0,k} h(v_t/\gamma_k)$  with  $h(x) = \frac{d}{dx} \left[ \sqrt{\frac{x^2}{1+x}} \right] = \frac{x+2}{2(1+x)^{3/2}}$  and  $\eta_{0,k} = 1/(2\sigma_{\max})$ . That this choice of learning rate is indeed nondecreasing can be proven using Lemma F.4. We use the following two elementary inequalities in relation to this specific choice of function  $h$ .

**Lemma C.1.** Let  $x \geq 0$ . The function  $h(x) = \frac{x+2}{2(1+x)^{3/2}}$  satisfies

$$\int_0^x h(x') dx' \leq \min \{x, \sqrt{x}\} \leq \max \{1, \sqrt{x}\}, \text{ and} \quad (20)$$

$$\frac{1}{h(x)} \leq \begin{cases} 1+x & \text{if } x \leq 1 \\ 2\sqrt{x} & \text{if } x > 1 \end{cases} \leq 2 \max \{1, \sqrt{x}\}, \quad (21)$$

where the first minimum is equalized at  $x = 1$ .

Using these upper bounds and the choice  $u_k = \pi_k \frac{\sigma_{\min}}{\sigma_k}$  in Proposition 2.2 gives the claimed result. Indeed, recall that Proposition 2.2 implies that

$$R_{t,k} \leq \sigma_k^2 \eta_{0,k} \int_0^{v_t} h(x/\gamma_k) dx + \frac{\ln(1/u_k)}{\eta_{t,k}} + \sum_{j \in K} \frac{u_j}{\eta_{t,j}} + \sigma_k^2 \eta_{0,k} \max_{s \leq t} \Delta v_s. \quad (22)$$

We now focus on bounding each term. First,

$$\int_0^{v_t} h(x/\gamma_k) dx = \gamma_k \int_0^{v_t/\gamma_k} h(x') dx' \leq \max \{\gamma_k, \sqrt{v_t \gamma_k}\}.$$

Consequently,

$$\sigma_k^2 \eta_{0,k} \int_0^{v_t} h(x/\gamma_k) dx \leq \sigma_k \sqrt{2v_t \ln(1/u_k)} + 4\sigma_{\max} \ln(1/u_k). \quad (23)$$

Next,

$$\frac{1}{\eta_k} = \frac{2\sigma_{\max}}{h(v/\gamma_k)} \leq 4\sigma_{\max} \max \left\{ 1, \sqrt{\frac{v_t}{\gamma_k}} \right\} \leq 4\sigma_{\max} + \sigma_k \sqrt{\frac{2v_t}{\ln(1/u_k)}}.$$

With this at hand, the second and third term on the right hand side of (22) can be bounded by

$$\frac{\ln(1/u_k)}{\eta_{t,k}} \leq \sigma_k \sqrt{2v_t \ln(1/u_k)} + 4\sigma_{\max} \ln(1/u_k), \text{ and} \quad (24)$$

$$\sum_{j \in K} \frac{u_j}{\eta_j} \leq c_{\sigma, \pi} \sigma_{\min} \sqrt{2v_t} + 4\sigma_{\max} \quad (25)$$

with  $c_{\sigma, \pi} = \sum_{k \in K} \pi_k \left( \frac{1}{\sqrt{\ln(1/u_k)}} \right)$ . Replace (23), (24), and (25) in the the regret bound (22) to obtain the result. In order to prove the second claim we follow a similar path; we use Proposition 2.2 as our main tool. Recall that in this case the learning rate is of the form  $\eta_{t,k} = \eta_{0,k} H_{2,k}(v_t)$  with  $\eta_{0,k} = 1/(2\sigma_{\max})$  and

$$H_{2,k}(x) = \frac{d}{dx} \left[ \sqrt{\alpha_k^2 \left\{ \left( 1 + \frac{x}{\alpha_k} \right) \ln \left( 1 + \frac{x}{\alpha_k} \right) - \frac{x}{\alpha_k} \right\} + \frac{x^2}{2(1+x/(2\gamma_k))}} \right]$$

with  $\alpha_k = 32 \frac{\sigma_{\max}^2}{\sigma_k^2}$  and  $\gamma_k = \alpha_k \ln(1/\pi_k)$ . The fact that  $k \mapsto H_{2,k}(x)$  is decreasing follows from Lemma F.4 after performing the change of variable  $x' = x/\alpha_k$ . We use the inequalities for  $H_{2,k}$  that are proven in the following lemma.

**Lemma C.2.** Let  $\beta_k = \ln(1/\pi_k)$ . The function  $H_{2,k}$  satisfies

$$\int_0^x H_{2,k}(x') dx' \leq \sqrt{\alpha_k x (\ln(1 + x/\alpha_k) + \beta_k)}, \text{ and} \quad (26)$$

$$\frac{1}{H_{2,k}(x)} \leq 2 \sqrt{\frac{x/\alpha_k}{\ln(1 + x/\alpha_k)}} \sqrt{1 + \frac{\min\{\beta_k, \frac{1}{2} \frac{x}{\alpha_k}\}}{\ln(1 + x/\alpha_k)}}. \quad (27)$$

We can now compute the analogs of (23), (24), and (25) to obtain that

$$\begin{aligned} \sigma_k^2 \eta_{0,k} \int_0^{v_t} H_{2,k}(x) dx &\leq 2\sigma_k \sqrt{2v_t \left( \ln \left( 1 + \frac{\sigma_k^2}{32\sigma_{\max}^2} v_t \right) + \ln(1/\pi_k) \right)}, \\ \frac{\ln(1/\pi_k)}{\eta_{t,k}} &\leq \sigma_k \ln(1/\pi_k) \sqrt{\frac{v_t}{2 \ln \left( 1 + \frac{\sigma_k^2}{32\sigma_{\max}^2} v_t \right)}} \left( 1 + \sqrt{\frac{\min\{\ln(1/\pi_k), \frac{\sigma_k^2}{16\sigma_{\max}^2} v_t\}}{\ln \left( 1 + \frac{\sigma_k^2}{32\sigma_{\max}^2} v_t \right)}} \right), \\ \sum_{j \in K} \frac{u_j}{\eta_j} &\leq \sum_{j \in K} \pi_j \left( \sigma_j \sqrt{\frac{v_t}{2 \ln \left( 1 + \frac{\sigma_j^2}{32\sigma_{\max}^2} v_t \right)}} \left( 1 + \frac{\sqrt{\min\{\ln(1/\pi_j), \frac{\sigma_j^2}{16\sigma_{\max}^2} v_t\}}}{\sqrt{\ln \left( 1 + \frac{\sigma_j^2}{32\sigma_{\max}^2} v_t \right)}} \right) \right), \end{aligned}$$

and employ them in Proposition 2.2 to obtain the result.  $\square$

*Proof of Lemma C.1.* The relations are clear for  $x = 0$ . Let  $x > 0$ . Recall that  $\int_0^x h(x') dx' = \frac{x}{\sqrt{1+x}}$ . We start by proving (20). The fact that  $\frac{x}{\sqrt{1+x}} \leq x$  is clear. The inequality  $\frac{x}{\sqrt{1+x}} \leq \sqrt{x}$  follows from dividing both sides of the inequality  $x \leq \sqrt{x^2 + x}$  by  $\sqrt{1+x}$ . Thus, the first inequality in (20) follows, and the second is direct after observing that  $x \leq \sqrt{x} \leq 1$  for  $x \leq 1$ . We now turn to proving (21). Recall that  $1/h(x) = \frac{2(1+x)^{3/2}}{2+x}$ . We start by showing that  $1/h(x) \leq 1+x$  for all  $x > 0$ . Note that  $\frac{2(1+x)^{3/2}}{2+x} = (1+x) \frac{2\sqrt{1+x}}{2+x}$ . Thus, the claim holds if and only if  $2\sqrt{1+x} \leq 2+x$ , which is easily checked to be the case. Now let  $x > 1$ . Observe that the second claim in the first inequality holds if and only if  $2(1+x)^{3/2} \leq 2\sqrt{x}(2+x)$ . Square both members and rearrange to conclude that the sought relation holds if and only if  $0 \leq 4x^2 + 4x - 4$ , which is the case as  $x > 1$ . The second inequality in (21) is clear.  $\square$

*Proof of Lemma C.2.* The inequalities contained in (26) and (27) are a consequence of the fact that

$$\int_0^x H_2(x') dx' = \sqrt{\alpha^2 \left\{ \left( 1 + \frac{x}{\alpha} \right) \ln \left( 1 + \frac{x}{\alpha} \right) - \frac{x}{\alpha} \right\} + \frac{x^2}{2(1+x/(2\gamma))}}$$

and the inequalities

$$(1+x') \ln(1+x') - x' \leq x' \ln(1+x') \quad \text{and} \quad \frac{a^2 x'^2}{2(1+x'/(2b))} \leq \min\{bx', \frac{1}{2}a^2 x'^2\},$$

that hold for  $x', a, b \geq 0$ . From this, (26) is immediate once we use the substitutions  $x' = x/\alpha$ ,  $a = \alpha$ , and  $b = \beta$ . To prove (27), use the same substitution and estimate

$$\begin{aligned} \frac{1}{H(x')} &= 2 \sqrt{\frac{(1+x') \ln(1+x') - x' + \frac{x'^2}{2(1+x'/(2b))}}{\ln(1+x') + \frac{1}{2} \frac{2x'+x'^2/(2b)}{(1+x'/(2b))^2}}} \\ &\leq 2 \sqrt{\frac{x' \ln(1+x') + \min\{bx', \frac{1}{2}x'^2\}}{\ln(1+x')}} \\ &= 2 \sqrt{\frac{x'}{\ln(1+x')}} \sqrt{1 + \frac{\min\{b, \frac{1}{2}x'\}}{\ln(1+x')}} \\ &\leq 2 \sqrt{\frac{x'}{\ln(1+x')}} \left( 1 + \sqrt{\frac{\min\{b, \frac{1}{2}x'\}}{\ln(1+x')}} \right). \end{aligned}$$

This is all we set ourselves to prove.  $\square$

## D Optimism, proof of Proposition 4.1

*Proof of Proposition 4.1.* In Lemma 2.1 we show that the potential  $t \mapsto \Phi_t$  is decreasing. The rest of the proof is identical to that of Proposition 2.3 after multiplying all scales by 2. The “furthermore” claim follows from a direct modification of Proposition G.1.  $\square$

## E Luckiness

This appendix contains the proofs of the luckiness results in Section 3.

### E.1 Proof of Theorem 3.1

*Proof of Theorem 3.1.* Let  $s_t = \sum_{s \leq t} \frac{\text{var}_{\tilde{\mathbf{w}}_s}(\ell_t)}{\langle \tilde{\mathbf{w}}_s, \sigma^2 \rangle}$ . It is shown in Proposition G.1 that  $v_t$  can be bounded in terms of  $s_t$ . Indeed, in any case  $v_t \leq 4$ , and because the learning rates are low enough at the start of the protocol, namely  $\eta_{t,k} \leq 1/(2\sigma_{\max})$ , the upper bound  $v_t \leq 4s_t$  also holds. A verification of the regret bound obtained in Proposition 2.2 shows that it is increasing in  $v_t$ , and consequently the same regret bound holds once we replace  $v_t$  with the larger quantity  $4s_t$ , and the proof of Proposition 2.3 can be repeated with no problems. Consequently the regret bounds in Proposition 2.3 are available with  $4s_t$  occupying the place of  $v_t$ . The next step that we follow is to show that  $\mathbf{E}_{\mathbf{P}}[s_t] \lesssim \mathbf{E}_{\mathbf{P}}[R_{t,k^*}]$ , which is done in the following lemma.

**Lemma E.1.** Under Massart’s condition (see Definition 1.3),

$$\mathbf{E}_{\mathbf{P}}[s_t] \leq k_{\mathbf{M}} \mathbf{E}_{\mathbf{P}}[R_{t,k^*}],$$

where  $k_{\mathbf{M}} = c_{\mathbf{M}} \max_{i,j \in K} \sup_{v \geq 0} \left\{ \frac{\eta_{0,i} H_i(v)}{\eta_{0,j} H_j(v) \sigma_j^2} \right\}$  satisfies

$$k_{\mathbf{M}} \leq 2c_{\mathbf{M}} \max_{i,j \in K} \left\{ \frac{1}{\sigma_i \sigma_j} \frac{\ln(1/\pi_i) + \ln(\sigma_i/\sigma_{\min})}{\ln(1/\pi_j) + \ln(\sigma_j/\sigma_{\min})} \right\}.$$

From the previous discussion, a small modification of Proposition 2.3 shows that this tuning guarantees a regret bound of the form

$$R_{t,k^*} \leq a' \sqrt{s_t} + b \quad (28)$$

with  $a' = 4\sigma_{k^*} \sqrt{2 \ln(1/u_{k^*})} + 2\sqrt{2} c_{\sigma, \pi} \sigma_{\min}$  and  $b = 8\sigma_{\max} \ln(1/u_{k^*}) + 4\sigma_{\max} + 2\sigma_{k^*}$ . Take  $\mathbf{P}$ -expectations in the last display, use the concavity of  $x \mapsto \sqrt{x}$  to invoke Jensen’s inequality, and use Lemma E.1 to obtain that

$$\mathbf{E}_{\mathbf{P}}[R_{t,k^*}] \leq a' \sqrt{k_{\mathbf{M}} \mathbf{E}_{\mathbf{P}}[R_{t,k^*}]} + b. \quad (29)$$

This implies that the expected regret satisfies  $\mathbf{E}_{\mathbf{P}}[R_{t,k^*}] \lesssim 1$ . Indeed, using Lemma E.2 yields that

$$\mathbf{E}_{\mathbf{P}}[R_{t,k^*}] \leq a'^2 k_{\mathbf{M}} + b. \quad (30)$$

The upper bound for  $k_{\mathbf{M}}$  is contained in Lemma E.3. Given the definition of  $a$  in the claim, this is what we set ourselves to prove.  $\square$

*Proof of Lemma E.1.* Recall that  $s_t = \sum_{s \leq t} \Delta s_s = \sum_{s \leq t} \frac{\text{var}_{\tilde{\mathbf{w}}_s}(\ell_s)}{\langle \tilde{\mathbf{w}}_s, \sigma^2 \rangle}$  with the weights  $\tilde{w}_{t,k} \propto w_{t,k} \eta_{t-1,k}$ . Define  $\ell_s^* = \ell_{s,k^*}$  to be the loss of the best expert  $k^*$ , and use that the variance  $\text{var}_{\tilde{\mathbf{w}}_s}(\ell_s)$  satisfies  $\text{var}_{\tilde{\mathbf{w}}_s}(\ell_s) \leq \langle \tilde{\mathbf{w}}_s, (\ell_s - \ell_s^*)^2 \rangle$  to obtain the estimate

$$\Delta s_s \leq \frac{\langle \tilde{\mathbf{w}}_s, (\ell_s - \ell_s^*)^2 \rangle}{\langle \tilde{\mathbf{w}}_s, \sigma^2 \rangle}.$$

Recall that, under  $\mathbf{P}$ , the loss vector  $\ell_s$  is assumed to be independent of  $\ell_{s-1}$ . This implies that

$$\begin{aligned} \mathbf{E}_{\mathbf{P}}[\Delta s_s] &\leq \sum_{k \in K} \left( \mathbf{E}_{\mathbf{P}} \left[ \frac{\tilde{w}_{s,k}}{\langle \tilde{\mathbf{w}}_s, \sigma^2 \rangle} \right] \mathbf{E}_{\mathbf{P}}[(\ell_{s,k} - \ell_s^*)^2] \right) \\ &\leq c_{\mathbf{M}} \sum_{k \in K} \left( \mathbf{E}_{\mathbf{P}} \left[ \frac{\tilde{w}_{s,k}}{\langle \tilde{\mathbf{w}}_s, \sigma^2 \rangle} \right] \mathbf{E}_{\mathbf{P}}[\ell_{s,k} - \ell_s^*] \right). \end{aligned}$$



Sum the last display over rounds, and use the fact that the weights  $\tilde{w}_{t,k} \propto w_{t,k} \eta_{t-1,k}$  to deduce that

$$\mathbf{E}_{\mathbf{P}}[s_t] \leq c_M \left\| \max_{s \leq t} \left\{ \frac{\max_{k \in K} \eta_{s-1,k}}{\min_{k \in K} \eta_{s-1,k} \sigma_k^2} \right\} \right\|_{\infty} \mathbf{E}_{\mathbf{P}}[R_{t,k^*}],$$

where  $\|\cdot\|_{\infty}$  is the infinity norm w.r.t.  $\mathbf{P}$  (recall that  $\eta_{t-1,k}$  depend on the random losses  $\ell_{t-1}$ ). Since, for any  $s = 1, \dots$ , and  $k \in K$ , the learning rate  $\eta_{s-1,k} = \eta_{0,k} H_k(v)$ , we can deduce that  $c_M \left\| \max_{s \leq t} \left\{ \frac{\max_{k \in K} \eta_{s-1,k}}{\min_{k \in K} \eta_{s-1,k} \sigma_k^2} \right\} \right\|_{\infty} \leq k_M$ , where  $k_M$  is as defined in the claim of the proposition. This implies what we set ourselves to prove.  $\square$

**Lemma E.2.** Let  $y, a, b \geq 0$ . If  $y^2 \leq ay + b$  then  $y \leq b + \sqrt{a}$ .

*Proof.* The quadratic polynomial  $y^2 - ay - b$  has a zero at  $y^* = \frac{b + \sqrt{b^2 + 4a}}{2} \leq b + \sqrt{a}$ . Hence, if  $y^2 \leq ay + b$ , then  $y \leq y^*$ , and the result follows.  $\square$

## E.2 Proof of Theorem 3.2

*Proof of Theorem 3.2.* Call  $\Delta_{t,k} = L_{s,k} - L_{s,k^*}$ , and  $d_k = \mathbf{E}_{\mathbf{P}}[\Delta_{t,k}]$ . Since  $\ell_s$  and  $\ell_{s-1}$  are independent, the expected value of the increment of the regret  $R_{t,k^*}$  is

$$\mathbf{E}_{\mathbf{P}}[\Delta R_{t,k^*}] = \sum_{k \neq k^*} \mathbf{E}_{\mathbf{P}}[w_{t,k}] \mathbf{E}_{\mathbf{P}}[\ell_{t,k} - \ell_{t,k^*}] \quad (31)$$

$$= \sum_{k \neq k^*} \mathbf{E}_{\mathbf{P}}[w_{t,k}] d_k. \quad (32)$$

We seek to prove that for  $k \neq k^*$ , in an event  $\Omega_{t,k}$  which we define next, the weight  $w_{t,k}$  is small. Define, for each  $k \neq k^*$  and  $t \geq 1$ , the event  $\Omega_{t,k}$  by

$$\Omega_{t,k} = \left\{ L_{t,k^*} - L_{t,k} \leq \mu_{t,k} - \mu_{t,k^*} - \frac{1}{\eta_{t,k^*}} \ln(1/\pi_{k^*}) - \frac{1}{\eta_{t,k}} \ln\left(\frac{1}{\pi_k \varepsilon_t}\right) \right\},$$

for deterministic constants  $\varepsilon_t = 1/t^2$ . Recall that the weights have the form  $w_{t,k} = \pi_k e^{-\eta_{t,k}(L_{t,k} + \mu_{t,k} + a_t^*)}$ , where  $a_t^*$  is such that  $\sum_k w_{t,k} = 1$ . Next, we show that, in each event  $\Omega_{t,k}$ , for carefully chosen  $\tilde{a}_t = -\frac{1}{\eta_{t,k^*}} \ln(1/\pi_{k^*}) - L_{t,k^*} - \mu_{t,k^*}$ , it holds that  $a_t^* \geq \tilde{a}_t$ . Indeed, this follows because, by design  $\pi_{k^*} e^{-\eta_{t,k}(L_{t,k} + \mu_{t,k} + \tilde{a}_t)} = 1$ , and consequently,

$$\sum_{k \in K} \pi_k (e^{-\eta_{t,k}(L_{t,k} + \mu_{t,k} + \tilde{a}_t)}) \geq 1 = \sum_{k \in K} \pi_k (e^{-\eta_{t,k}(L_{t,k} + \mu_{t,k} + a_t^*)}),$$

which implies  $a_t^* \geq \tilde{a}_t$ . We use this in the weight  $w_{t,k}$  of expert  $k$  to conclude that

$$\mathbf{E}_{\mathbf{P}}[w_{t,k} \mathbf{1}\{\Omega_{t,k}\}] \leq \pi_k (e^{-\eta_{t,k}(L_{t,k} + \mu_{t,k} + \tilde{a}_t)}) = \pi_k \varepsilon_t,$$

hence

$$\mathbf{E}_{\mathbf{P}}[w_{t,k}] \leq \pi_k \varepsilon_t + \mathbf{P}\{\Omega_{t,k}^c\}.$$

Consequently, using (32),

$$\mathbf{E}_{\mathbf{P}}[R_{t,k^*}] = \sum_{s \leq t} \sum_{k \neq k^*} d_k \mathbf{E}_{\mathbf{P}}[w_{s,k}] d_k \quad (33)$$

$$\leq \sum_{s \leq t} \sum_{k \neq k^*} \{\pi_k d_k \varepsilon_s + d_k \mathbf{P}\{\Omega_{s,k}^c\}\} \quad (34)$$

$$\leq 2 \sum_{k \in K} \pi_k d_k + \sum_{s \leq t} \sum_{k \neq k^*} d_k \mathbf{P}\{\Omega_{s,k}^c\}, \quad (35)$$

where we used that  $\sum_s \varepsilon_s \leq \pi^2/6 \leq 2$ . We now focus on bounding the probabilities  $\mathbf{P}\{\Omega_{s,k}^c\}$ . We use that  $\Delta \mu_{t,k} \geq 0$  to deduce that

$$\begin{aligned} \mathbf{P}\{\Omega_{t,k}^c\} &= \mathbf{P}\left\{L_{t,k^*} - L_{t,k} > \mu_{t,k} - \mu_{t,k^*} - \frac{1}{\eta_{t,k^*}} \ln(1/\pi_{k^*}) - \frac{1}{\eta_{t,k}} \ln(1/\varepsilon_t)\right\} \\ &\leq \mathbf{P}\left\{L_{t,k^*} - L_{t,k} > -\mu_{t,k^*} - \frac{1}{\eta_{t,k^*}} \ln(1/\pi_{k^*}) - \frac{1}{\eta_{t,k}} \ln(1/\varepsilon_t)\right\}. \end{aligned}$$

In order to continue, we derive an upper bound on  $\mu_{t,k^*}$ , and a lower bound on  $\eta_{t,k}$ , and  $\eta_{t,k^*}$  consisting of deterministic functions of time. Recall from Lemma G.1 that  $v_t \leq 4t$ , and that Lemma C.2 can be used to bound  $\mu_{t,k^*}$  in terms of the integral of the function  $x \mapsto H_{2,k^*}(x)$  (see proof of Proposition 2.3) to obtain that

$$\begin{aligned}\mu_{t,k^*} &\leq \sigma_{k^*}^2 \eta_{0,k^*} \int_0^{4t} H_{2,k^*}(v) dv + 4\sigma_{k^*}^2 \eta_{0,k^*} \\ &\leq 4\sigma_{k^*} \sqrt{2t(\ln(1+t/8) + \ln(1/\pi_{k^*}))} + 4\sigma_{k^*}\end{aligned}$$

Now fix  $k \in K$ , and use again that  $v_t \leq 4t$  and that  $x \mapsto H_{2,k}(x)$  is decreasing (see Lemma F.4) to deduce that  $\eta_{t,k} = \eta_{0,k} H_k(v_t) \geq \eta_{0,k} H_k(4t)$ . From these observations,  $\mathbf{P}\{\Omega_{t,k}^c\}$  can be further bounded by

$$\mathbf{P}\{\Omega_{t,k}^c\} \leq \mathbf{P}\{L_{t,k^*} - L_{t,k} > -F_k(t)\},$$

where the complicated  $F_k(t) = 4\sigma_{k^*} \sqrt{2t(\ln(1+t/8) + \ln(1/\pi_{k^*}))} + 4\sigma_{k^*} + \frac{\ln(1/\pi_{k^*})}{\eta_{0,k^*} H_{2,k^*}(4t)} + \frac{\ln(1/\varepsilon_t)}{\eta_{0,k} H_{2,k}(4t)}$  is a deterministic function of time. Recall that the gap  $d_{\min}$  was defined as  $d_{\min} = \min_{k \neq k^*} d_k$  and that is assumed to be strictly positive. Recall that  $\Delta_{t,k} = L_{t,k} - L_{t,k^*}$  is the gap in losses between expert  $k$  and the best expert  $k^*$ . Hoeffding's inequality implies that

$$\begin{aligned}\mathbf{P}\{L_{t,k^*} - L_{t,k} > F_k(t)\} &= \mathbf{P}\{td_k - \Delta_{t,k} > td_k - F_k(t)\} \\ &\leq \exp\left(-\frac{t}{2\sigma_{\max}^2}((d_k - F_k(t)/t)_+)^2\right) \\ &= \exp\left(-\frac{td_k^2}{2\sigma_{\max}^2}((1 - F_k(t)/(d_k t))_+)^2\right),\end{aligned}$$

where  $x \mapsto (x)_+ = \max\{0, x\}$ . We now seek a bound on the point  $t_k^*$  at which  $F_k(t_k^*)/t_k^* = d_k/2$ . For these values  $t_k^*$ , we have, using (35), that

$$\mathbf{E}_{\mathbf{P}}[R_{t,k^*}] \leq 2 \sum_{k \in K} \pi_k d_k + \sum_{k \neq k^*} (t_k^* d_k + \sum_{s \geq t^*} d_k \mathbf{P}\{\Omega_{t,k}^c\}). \quad (36)$$

We now concentrate on bounding  $t_k^*$  and the probability of the event  $\Omega_{t,k}^c$  for each  $k$ . In the limit that  $d_k \rightarrow 0$ , the time  $t_k^* \rightarrow \infty$ . A quick computation shows that, as  $t \rightarrow \infty$ ,  $H_{2,k}(t) \sim \sqrt{\frac{2 \ln t}{t}}$ , and, in the same limit,  $4\sigma_{k^*} \sqrt{2t(\ln(1+t/8) + \ln(1/\pi_{k^*}))} + 4\sigma_{k^*} \sim 4\sigma_{k^*} \sqrt{2t \ln t}$ . Hence, as  $t \rightarrow \infty$ , the function  $F_k$  satisfies  $F_k(t) \sim (4\sigma_{k^*} + 2\sigma_{\max}) \sqrt{2t \ln t}$ . We now give a bound on the solution  $x_k^*$  to the equation  $x d_k/2 = (4\sigma_{k^*} + 2\sigma_{\max}) \sqrt{2x \ln x}$  that holds asymptotically as  $d_k \rightarrow 0$ . Call  $c = d_k/(2\sqrt{2}(4\sigma_{k^*} + 2\sigma_{\max}))$ . Our equation of interest can be rewritten as  $x c^2 = \ln x$ . Linearize  $x \ln x$  around  $x = 2/c^2$ , and use its concavity to obtain that  $\ln(x) \leq \ln(2/c^2) + (c^2/2)(x - 2/c^2)$ . With this estimate at hand, the solution to the simpler, linear equation  $x c^2 = \ln(2/c^2) + (c^2/2)(x - 2/c^2)$  is an upper bound on  $x_k^*$ . From this discussion it follows that the point  $t_k^*$  of interest satisfies  $t_k^* \leq 2 \frac{\ln(1/c^2)}{c^2} - \frac{2}{c^2}$ . Hence, as  $d_k \rightarrow 0$ ,

$$d_k t_k^* \leq \frac{2(4\sigma_{k^*} + 2\sigma_{\max})^2}{d_k} \left\{ \ln \left( \frac{8(4\sigma_{k^*} + 2\sigma_{\max})^2}{d_k^2} \right) - 1 \right\} = O \left( \frac{\sigma_{\max}^2}{d_k} \ln \left( \frac{\sigma_{\max}^2}{d_k^2} \right) \right). \quad (37)$$

We deduce that, as  $d_k \rightarrow 0$ , for  $t \geq t_k^*$  and any  $k \neq k^*$ , the probability  $\mathbf{P}\{\Omega_{t,k}^c\} \leq \exp\left(-\frac{t}{8\sigma_{\max}^2} d_k^2\right)$ . We sum  $\mathbf{P}\{\Omega_{t,k}^c\}$  over rounds to conclude that

$$\mathbf{E}_{\mathbf{P}}[R_{t,k^*}] \leq 2 \sum_{k \in K} \pi_k d_k + \sum_{k \neq k^*} (t_k^* d_k + \sum_{s \geq t^*} d_k \mathbf{P}\{\Omega_{t,k}^c\}). \quad (38)$$

We now concentrate on bounding  $t_k^*$  and the probability of the event  $\Omega_{t,k}^c$  for each  $k$ . In the limit that  $d_k \rightarrow 0$ , the time  $t_k \rightarrow \infty$ . A quick computation shows that, as  $t \rightarrow \infty$ ,  $H_{2,k}(t) \sim \sqrt{\frac{2 \ln t}{t}}$ , and, in the same limit,  $4\sigma_{k^*} \sqrt{2t(\ln(1+t/8) + \ln(1/\pi_{k^*}))} + 4\sigma_{k^*} \sim 4\sigma_{k^*} \sqrt{2t \ln t}$ . Hence, as  $t \rightarrow \infty$ , the function  $F_k$  satisfies  $F_k(t) \sim (4\sigma_{k^*} + 2\sigma_{\max}) \sqrt{2t \ln t}$ . We know give a bound on the solution  $x_k^*$

to the equation  $xd_k/2 = (4\sigma_{k^*} + 2\sigma_{\max})\sqrt{2x \ln x}$  that holds asymptotically as  $d_k \rightarrow 0$ . Call  $c = d_k/(2\sqrt{2}(4\sigma_{k^*} + 2\sigma_{\max}))$ . Our equation of interest can be rewritten as  $xc^2 = \ln x$ . Linearize  $x \ln x$  around  $x = 2/c^2$ , and use its concavity to obtain that  $\ln(x) \leq \ln(2/c^2) + (c^2/2)(x - 2/c^2)$ . With this estimate at hand, the solution to the simpler, linear equation  $xc^2 = \ln(2/c^2) + (c^2/2)(x - 2/c^2)$  is an upper bound on  $x_k^*$ . From this discussion it follows that the point  $t_k^*$  of interest satisfies

$$t_k^* \leq 2 \frac{\ln(1/c^2)}{c^2} - \frac{2}{c^2} = O\left(\frac{\sigma_{\max}}{d_k^2} \ln \frac{\sigma_{\max}^2}{d_k^2}\right), \quad (39)$$

as  $d_k \rightarrow 0$ . Hence, again, as  $d_k \rightarrow 0$ ,

$$\sum_{t \geq t^*} d_k \mathbf{P}\{\Omega_{t,k}^c\} \leq \sum_{t \geq t^*} d_k e^{-td_k^2/(8\sigma_{\max}^2)} \leq \frac{d_k}{1 - e^{-d_k^2/(8\sigma_{\max}^2)}}. \quad (40)$$

We use (39) and (40) in (38), and the fact that  $d/(1 + e^{d^2/\sigma^2}) = O(\sigma^2/d)$  as  $d \rightarrow 0$  to conclude the proof.  $\square$

### E.3 In Lemma E.1, $k_M$ is bounded

**Lemma E.3.** In Lemma E.1, the constant  $k_M$  is bounded for Tuning 1, shown in Figure 2. More precisely,

$$k_M \leq 2 \max_{i,j \in K} \left\{ \frac{1}{\sigma_i \sigma_j} \frac{\ln(1/\pi_i) + \ln(\sigma_i/\sigma_{\min})}{\ln(1/\pi_j) + \ln(\sigma_j/\sigma_{\min})} \right\}.$$

*Proof.* Recall that in both tunings of the algorithm we use the starting learning rate  $\eta_{0,k} = 1/(2\sigma_{\max})$ , a constant over the experts. As long as this is the case, the constant of interest  $k_M$  can be bounded by

$$k_M \leq \max_{i,j \in K} \sup_v \frac{H_i(v)}{\sigma_j^2 H_j(v)}. \quad (41)$$

Recall from Figure 2 that  $H_{1,k}(v) = \frac{v/\gamma_k + 2}{2(1+v/\gamma_k)^{3/2}}$  with  $\gamma_k = 8 \frac{\sigma_{\max}^2}{\sigma_k^2} (\ln(1/\pi_k) + \ln(\sigma_k/\sigma_{\min}))$ . We can estimate the ratio

$$\begin{aligned} \frac{H_i(v)}{H_j(v)} &= \frac{v/\gamma_i + 2}{(1+v/\gamma_i)^{3/2}} \frac{(1+v/\gamma_j)^{3/2}}{v/\gamma_j + 2} \\ &\leq \frac{2v/\gamma_i + 2}{(1+v/\gamma_i)^{3/2}} \frac{(1+v/\gamma_j)^{3/2}}{v/\gamma_j + 1} \\ &= 2 \sqrt{\frac{1+v/\gamma_j}{1+v/\gamma_i}} \\ &\leq 2 \max \left\{ 1, \sqrt{\frac{\gamma_i}{\gamma_j}} \right\}. \end{aligned}$$

Hence

$$k_M \leq 2 \max_{i,j \in K} \left\{ \frac{1}{\sigma_i \sigma_j} \frac{\ln(1/\pi_i) + \ln(\sigma_i/\sigma_{\min})}{\ln(1/\pi_j) + \ln(\sigma_j/\sigma_{\min})} \right\},$$

as it was to be shown.  $\square$

## F Technical Lemmas

In this appendix we gather technical results used in previous sections.

### F.1 For showing that the potential decreases

**Lemma F.1.** For fixed  $X$ , the function  $\eta \mapsto \Phi(X, \eta)$  is increasing, that is, if  $\eta_k \leq \eta'_k$ , then, for fixed  $X$ , it holds that  $\Phi(X, \eta) \leq \Phi(X, \eta')$ .

*Proof.* It follows from the definition of  $\Phi$  and the fact that, for all  $x \geq 0$ , the function  $x \mapsto -\ln(x) - 1 + x$  is nonnegative. Indeed, for any  $w \in \mathcal{P}(K)$ , it holds that

$$\begin{aligned} D_{\boldsymbol{\eta}}(\mathbf{w}, \mathbf{u}) &= \sum_{k \in K} w_k \left( \frac{\ln(w_k/u_k) - (1 - u_k/w_k)}{\eta_k} \right) \\ &\geq \sum_{k \in K} w_k \left( \frac{\ln(w_k/u_k) - (1 - u_k/w_k)}{\eta'_k} \right) \\ &= D_{\boldsymbol{\eta}'}(\mathbf{w}, \mathbf{u}). \end{aligned}$$

The result follows from the definition of  $\Phi$  contained in (4).  $\square$

**Lemma F.2.** Fix vectors  $\mathbf{X}, \mathbf{m} \in \mathbb{R}^K$  and  $\mathbf{u}, \boldsymbol{\eta} \in \mathbb{R}_+^K$ . Let  $\mathbf{w}$  be the optimum value  $\mathbf{w} = \arg \max_{\mathbf{p} \in \mathcal{P}(K)} \langle \mathbf{p}, \mathbf{X} + \mathbf{m} \rangle - D_{\boldsymbol{\eta}}(\mathbf{p}, \mathbf{u})$ . Then,

$$\Phi(\mathbf{X} + \mathbf{m} - \langle \mathbf{w}, \mathbf{m} \rangle, \boldsymbol{\eta}) \leq \Phi(\mathbf{X}, \boldsymbol{\eta})$$

*Proof.* The result follows from the chain of inequalities

$$\begin{aligned} \Phi(\mathbf{X} + \mathbf{m} - \langle \mathbf{w}, \mathbf{m} \rangle, \mathbf{u}) &= \langle \mathbf{w}, \mathbf{X} + \mathbf{m} - \langle \mathbf{w}, \mathbf{m} \rangle \rangle - D_{\boldsymbol{\eta}}(\mathbf{w}, \mathbf{u}) \\ &= \langle \mathbf{w}, \mathbf{X} \rangle - D_{\boldsymbol{\eta}}(\mathbf{w}, \mathbf{u}) \\ &\leq \Phi(\mathbf{X}, \boldsymbol{\eta}). \end{aligned}$$

$\square$

## F.2 For bounding $\mu$ with $v$

The following is the consequence of a standard result in the theory of Riemann integration.

**Lemma F.3.** Let  $x \mapsto H(x)$  be a decreasing, positive, real, and continuous function such that  $H(x) < \infty$  on  $0 \leq x < \infty$ . If  $\Delta v_s \geq 0$  for  $s = 1, 2, \dots, t$  then

$$\sum_{s \leq t} H(v_{s-1}) \Delta v_s \leq \int_0^{v_t} H(x) dx + (H(0) - H(v_t)) \max_{s \leq t} \Delta v_t,$$

where  $v_t = \sum_{s \leq t} \Delta v_s$ .

*Proof.* Because  $H$  is decreasing and  $t \mapsto v_t = \sum_{s \leq t} \Delta v_s$  is nondecreasing,

$$\int_0^{v_t} H(x) dx \geq \sum_{s \leq t} H(v_s) \Delta v_s.$$

Use this observation to deduce that

$$\begin{aligned} \sum_{s=1}^t H(v_s) \Delta v_s - \int_0^{v_t} H(x) dx &\leq \sum_{s \leq t} (H(v_{s-1}) - H(v_s)) \Delta v_s \\ &\leq (H(0) - H(v_t)) \max_{s \leq t} \Delta v_s, \end{aligned}$$

which is what we set ourselves to prove.  $\square$

## F.3 The learning rates decrease

**Lemma F.4.** The functions  $f(x) = \frac{x+2}{2(1+x)^{3/2}}$  and  $g(x) = \frac{\ln(1+x) + \frac{2x+x^2/a}{(1+x/a)^2}}{\sqrt{(1+x) \ln(1+x) - x + \frac{x^2}{2(1+x/a)}}}$  are decreasing in  $x \geq 0$  for any fixed  $a > 0$ .

*Proof.* The function  $f$  is differentiable in  $x \geq 0$ , and its derivative is  $f'(x) = -\frac{x+4}{(1+x)^{5/2}}$ , a negative function. Thus,  $f$  is decreasing. We turn our attention to the function  $g$ . Let  $h_1(x) = \ln(1+x)$ ,  $h_2(x) = \frac{2x+x^2/a}{(1+x/a)^2}$ , and let  $H_1(x) = \int_0^x h_1(s) ds = (1+x) \ln(1+x) - x$ , and  $H_2(x) = \int_0^x h_2(s) ds =$

$\frac{x^2}{2(1+x/a)}$ . Then, the function  $g$  is of the form  $h/(2\sqrt{H})$  with  $h = h_1 + h_2$ , and  $H = H_1 + H_2$ . Since  $g(x)$  is differentiable in  $x \geq 0$ , it is enough to prove that  $g' \leq 0$ . We compute the derivative  $g' = \frac{h'(x)\sqrt{H(x)} - h^2(x)/(2\sqrt{H(x)})}{H(x)}$  and conclude that  $g' \leq 0$  if and only if

$$h'(x)H(x) \leq \frac{1}{2}h^2(x). \quad (42)$$

Since  $h_1/\sqrt{H_1} = \frac{\sqrt{2}}{2}f(x/a)$ , the analog of the last display holds for the pair  $h_1, H_1$ . We will show that the same holds true for the pair  $h_2, H_2$  at the end of the proof. For now, use that (42) holds for both pairs, replace the definition of  $h$  and  $H$ , and conclude that it is enough to show that

$$h'_1 H_2 + h'_2 H_1 \leq h_1 h_2.$$

We now focus on showing that  $\delta^* = h_1 h_2 - h'_1 H_2 - h'_2 H_1$  is nonnegative. Define  $\delta(x) = (1 + x/a)^3(x+1)2a^3\delta^*(x)$ . It is clear that it is sufficient to our purposes to show that  $\delta(x) \geq 0$  for  $x \geq 0$ . Computation shows that

$$\begin{aligned} \delta(x) &= a^3 x^2 - 2a^2 x^3 - a x^4 + 2a^3 x + \\ &\quad ((4a+1)x^4 + x^5 - 2a^3 x + 5a^2 x^2 + (5a^2 + 4a)x^3 - 2a^3) \ln(x+1). \end{aligned}$$

Since  $\delta(0) = 0$ , it is enough to show that its derivative is positive; that  $\delta'(x) \geq 0$  for  $x \geq 0$ . Computation shows that

$$\begin{aligned} \delta'(x) &= 2a^3 x - a^2 x^2 + x^4 + \\ &\quad (4(4a+1)x^3 + 5x^4 - 2a^3 + 10a^2 x + 3(5a^2 + 4a)x^2) \ln(x+1). \end{aligned}$$

We now pay attention to the first three summands of the previous display. We use that  $2a^3 x - a^2 x^2 + x^4 = x(2a^3 - a^2 x + x^3) \geq \ln(1+x)(2a^3 - a^2 x + x^3)$ , which follows from the fact that last factor of the last equation is a depressed cubic that is nonnegative for  $x, a \geq 0$ . This fact, the previous display, and a short computation together imply that

$$\frac{\delta'(x)}{\ln(1+x)} \geq (16a+5)x^3 + 5x^4 + 9a^2 x + 3(5a^2 + 4a)x^2,$$

which shows that  $\delta'(x) \geq 0$  for  $x \geq 0$ . This in turn shows that the function  $\delta$  is positive, that consequently the relation (42) holds, and finally, that the original function of interest  $g$  is decreasing.  $\square$

#### F.4 For bounding $\Delta v$ in terms of $\Delta s$

**Lemma F.5.** Let  $y, x, b \in \mathbb{R}$  be such that  $b \geq 0$ ,  $x \leq b$ , and  $y > 0$ . Let  $\varphi = \frac{e^b - 1 - b}{\frac{1}{2}b^2} \geq 1$ . Then the following statements hold.

1. For  $g(y) = \frac{\varphi - 1 - \sqrt{(\varphi - 1)^2 + 2\varphi y}}{\varphi} - \ln\left(\varphi - \sqrt{(\varphi - 1)^2 + 2\varphi y}\right)$ , we have

$$e^{x-g(y)} - 1 - x \leq \frac{1}{2}\varphi x^2 - y$$

any time that  $y \leq \frac{2\varphi - 1}{\varphi}$ .

2. Let  $c = \varphi/(\varphi - 1)$ . For any  $0 < s < 1/c$  it holds that

$$e^{x-s-h(cs)} - 1 - x \leq \frac{1}{2}\varphi x^2 - s,$$

where

$$h(u) = -u - \ln(1-u) \leq \frac{1}{2} \frac{u^2}{1-u}$$

for  $0 < u < 1$ .

*Proof.* Proving our claim is equivalent to proving that

$$g(z) \geq x - \ln \left( 1 - z + x + \frac{1}{2} \varphi x^2 \right).$$

The condition that  $z < \frac{2\varphi-1}{2\varphi}$  ensures that the logarithm is well defined. The first claim follows because  $g$  was chosen as the maximizer over  $x \leq b$  of the right hand side of the previous display.

Indeed, the maximizer is  $-x^*(z)$  with  $x^*(z) = -\frac{\varphi-1-\sqrt{(\varphi-1)^2+2\varphi z}}{\varphi} \geq 0$ . Now we turn to proving the second claim, which will follow from a series of rewritings of the first claim. The previous display can be rewritten as

$$g(z) = -x^*(z) - \ln(1 - \varphi x^*(z)).$$

Let  $s' = x^*(z)$  so that  $z = \frac{1}{2}\varphi s'^2 + (\varphi - 1)s'$ . If we let  $h(u) = -u - \ln(1 - u)$ , the previous display can be rewritten as

$$g(z) = (\varphi - 1)s' + h(\varphi s').$$

In these terms, the first claim that we already proved takes the shape

$$e^{x-(\varphi-1)s'-h(\varphi s')} - 1 - x \leq \frac{1}{2}\varphi x^2 - (\varphi - 1)s' - \frac{1}{2}\varphi s'^2$$

any time that  $s' \leq 1/\varphi$ . Define  $s = (\varphi - 1)s'$ . Replace this in the last display and bound the last, negative term by 0 to obtain that, as long as  $s \leq \frac{\varphi-1}{\varphi}$ ,

$$e^{x-s-h(cs)} - 1 - x \leq \frac{1}{2}\varphi x^2 - s.$$

This is our claim. The additional bound on  $h$  is well known and can be proven with a term-wise bound on the Taylor expansion of  $u \mapsto -u - \ln(1 - u)$ .  $\square$

## F.5 Dual formulation of $\Delta\Phi$

Recall from the definitions in Section 2 that the Bregman divergence  $D_\eta(\mathbf{p}, \mathbf{u})$  between  $\mathbf{p}$  and  $\mathbf{u}$ , two vectors in  $\mathbb{R}_+^K$ , was defined in (3) as

$$D_\eta(\mathbf{p}, \mathbf{u}) = \sum_{k \in K} p_k \left( \frac{\ln(p_k/u_k) - (p_k - u_k)}{\eta_k} \right);$$

and the corresponding potential  $\Phi$ , in (4) as

$$\Phi(\mathbf{X}, \boldsymbol{\eta}) = \sup_{\mathbf{p} \in \mathcal{P}(K)} \langle \mathbf{p}, \mathbf{X} \rangle - D_\eta(\mathbf{p}, \mathbf{u}).$$

In the implementation of the algorithm, we rely on the dual formulation of the potential  $\Phi$  and its change  $\Delta\Phi$  between rounds. We compute these in the following two lemmas.

**Lemma F.6** (Potential difference in dual form). Let  $\mathbf{X}, \Delta\mathbf{X} \in \mathbb{R}^K$  and  $\mathbf{u}, \boldsymbol{\eta} \in \mathbb{R}_+^K$ ,  $\Delta\Phi = \Phi(\mathbf{X} + \Delta\mathbf{X}, \boldsymbol{\eta}) - \Phi(\mathbf{X}, \boldsymbol{\eta})$ , and  $\mathbf{w} = \arg \max_{\mathbf{p} \in \mathcal{P}(K)} \langle \mathbf{p}, \mathbf{X} \rangle - D_\eta(\mathbf{p}, \mathbf{u})$ . Then

$$\Delta\Phi = \inf_{\Delta a \in \mathbb{R}} \sum_{k \in K} w_k \left( \frac{e^{\eta_k(\Delta X_k - \Delta a)} + \eta_k \Delta a - 1}{\eta_k} \right).$$

*Proof.* From Lemma F.7 we know that

$$w_k = u_k e^{\eta_k(X_k - a^*)},$$

where  $a^*$  is such that  $\sum_{k \in K} w_k = 1$ , and that

$$\Phi(\mathbf{X}, \boldsymbol{\eta}) = a^* + \sum_{k \in K} u_k \left( \frac{e^{\eta_k(X_k - a^*)} - 1}{\eta_k} \right).$$

Use the same lemma and the change of variable  $a = a^* + \Delta a$  to obtain that

$$\Phi(\mathbf{X} + \Delta\mathbf{X}, \boldsymbol{\eta}) = \inf_{\Delta a \in \mathbb{R}} \left\{ a^* + \Delta a + \sum_{k \in K} u_k \left( \frac{e^{\eta_k(X_k - a^* + \Delta X_k - \Delta a)} - 1}{\eta_k} \right) \right\}.$$

Subtract these two displays and use the explicit expression for  $w$ . In this way, we obtain the result.  $\square$

**Lemma F.7** (Potential Dual). Let  $\mathbf{X} \in \mathbb{R}^K$  be a vector, and let  $\mathbf{u}, \boldsymbol{\eta} \in \mathbb{R}_+^K$  be positive vectors. Then

1. The potential  $\Phi$  satisfies

$$\Phi(\mathbf{X}, \boldsymbol{\eta}) = \langle \mathbf{p}^*, \mathbf{X} \rangle - D_{\boldsymbol{\eta}}(\mathbf{p}^*, \mathbf{u}),$$

where  $p_k^* = u_k e^{\eta_k(X_k - a^*)}$ , and  $a^*$  is such that  $\sum_{k \in K} p_k^* = 1$ .

2. The potential  $\Phi$  satisfies the identity

$$\Phi(\mathbf{X}, \boldsymbol{\eta}) = \inf_{a \in \mathbb{R}} \left\{ a + \sum_{k \in K} u_k \left( \frac{e^{\eta_k(X_k - a)} - 1}{\eta_k} \right) \right\}.$$

*Proof.* Consider the optimization problem

$$\sup_{\mathbf{p} \in \mathcal{P}(K)} \langle \mathbf{p}, \mathbf{X} \rangle - D_{\boldsymbol{\eta}}(\mathbf{p}, \mathbf{u}).$$

Its Lagrangian function is

$$\mathcal{L}(a, \mathbf{p}) = \langle \mathbf{p}, \mathbf{X} \rangle - D_{\boldsymbol{\eta}}(\mathbf{p}, \mathbf{u}) - a \left( \sum_{k \in K} p_k - 1 \right).$$

The strong duality relation

$$\sup_{\mathbf{p} \in \mathcal{P}(K)} \langle \mathbf{p}, \mathbf{X} \rangle + D_{\boldsymbol{\eta}}(\mathbf{p}, \mathbf{u}) = \inf_{a \in \mathbb{R}} \sup_{\mathbf{p} \in \mathbb{R}^K} \mathcal{L}(a, \mathbf{p}) \quad (43)$$

holds, and the maximum on the right hand side can be computed by differentiation. The gradient with respect to  $\mathbf{p}$  is

$$\nabla_{\mathbf{p}} \mathcal{L}_k = X_k - a - \frac{\ln(p_k/u_k)}{\eta_k},$$

which is zero at

$$p_k^* = u_k e^{\eta_k(X_k - a)}.$$

Replace  $\mathbf{p}^*$  in the Lagrangian  $\mathcal{L}$  to conclude that

$$\mathcal{L}(a, \mathbf{p}^*) = a + \sum_{k \in K} u_k \left( \frac{e^{\eta_k(X_k - a)} - 1}{\eta_k} \right).$$

Replace this in (43) to obtain the second claim. For the first claim, differentiate  $\inf_{a \in \mathbb{R}} \mathcal{L}(a, \mathbf{p}^*)$  with respect to  $a$  and equate to 0.  $\square$

## G Proof of Theorem 1.2

Recall that  $\Delta v_t$  is implicitly specified in the definition of MUSCADA, in Figure 1. The main intuition driving the result contained in Theorem 1.2 stems from a Taylor approximation of the increment of the potential function at round  $t$  for small learning rates. The duality computation for the potential increment  $\Delta \Phi$  of Lemma F.6 implies that, at round  $t$ ,  $\Delta v_t$  is the value of  $\Delta v$  that satisfies

$$\inf_{\lambda \in \mathbb{R}} \sum_{k \in K} w_{t,k} \left( \frac{e^{-\eta_{t-1,k}(\ell_{t,k} - \lambda) - \eta_{t-1,k}^2 \sigma_k^2 \Delta v} + \eta_{t-1,k}(\ell_{t,k} - \lambda) - 1}{\eta_{t-1,k}} \right) = 0, \quad (44)$$

where, in the notation of Lemma F.6, we used  $\Delta \mathbf{X} = \Delta \mathbf{R}_t$  and reparametrized by  $\lambda = \langle \mathbf{w}_t, \boldsymbol{\ell}_t \rangle - \Delta a$ . For small values of  $\eta$ , the Taylor approximation  $e^{\eta x - \eta^2 b} = 1 + \eta x + \frac{1}{2} \eta^2 (x^2 - 2b) + O(\eta^3)$  gives that, if all the learning rates are small, the quantity being minimized in the previous display can be approximated as

$$\begin{aligned} \sum_{k \in K} w_{t,k} \left( \frac{e^{-\eta_{t-1,k}(\ell_{t,k} - \lambda) - \eta_{t-1,k}^2 \sigma_k^2 \Delta v} + \eta_{t-1,k}(\ell_{t,k} - \lambda) - 1}{\eta_{t-1,k}} \right) &\approx \\ \frac{1}{2} \sum_{k \in K} w_{t,k} \eta_{t-1,k} (\ell_{t,k} - \lambda)^2 - \Delta v \sum_{k \in K} w_{t,k} \eta_{t-1,k} \sigma_k^2. \end{aligned} \quad (45)$$

If this approximate expression could be plugged into (44), we could solve the infimum and obtain that

$$\Delta v_t \approx \frac{1}{2} \frac{\text{var}_{\tilde{\mathbf{w}}}(\ell_t)}{\langle \tilde{\mathbf{w}}, \sigma^2 \rangle}$$

with  $\tilde{w}_{t,k} \propto w_{t,k} \eta_{t-1,k}$ . However, this approximation is only valid under range restrictions in the values of  $\lambda$ . This is the subject of Lemma G.2, whose main technical ingredient is the inequality obtained in Lemma F.5, which contains an estimate that makes (45) precise. We gather these results in the following proposition. Used with  $b = 1$ , it implies Theorem 1.2 because the learning rates from Figure 2 are all smaller than  $1/(2\sigma_{\max})$ .

**Proposition G.1.** *Fix  $t \geq 1$ . Let  $\tilde{w}_{t,k} \propto w_{t,k} \eta_{t-1,k}$ , where  $\mathbf{w}_t$  are the weights played by MUSCADA at round  $t$ , and  $\eta_{t-1}$  its learning rates. The following statements hold.*

1. *If  $\max_k 2\eta_{t-1,k}\sigma_k \leq b$  and  $b \leq 1$ , then*

$$\Delta v_t \leq c_0 \frac{\langle \tilde{\mathbf{w}}_t, \ell_t^2 \rangle}{\langle \tilde{\mathbf{w}}_t, \sigma^2 \rangle} \leq c_0, \quad (46)$$

*where the constant  $c_0$  satisfies  $c_0 \leq 3.1$  and depends only on  $b$ .*

2. *If  $\max_k 2\eta_{t-1,k}\sigma_{\max} \leq b$  for some  $b \leq 1$ , and*

$$\Delta s_t = \frac{\text{var}_{\tilde{\mathbf{w}}}(\ell_t)}{\langle \tilde{\mathbf{w}}_t, \sigma^2 \rangle},$$

*then*

$$\Delta v_t \leq c_1 \Delta s_t + c_2 \Delta s_t^2, \quad (47)$$

*and consequently*

$$v_t \leq c_3 s_t,$$

*where  $c_1 \leq 0.72$ ,  $c_2 \leq 2.4$ , and  $c_3 = c_1 + c_2 \leq 3.1$  depend on  $b$  only.*

*Proof of Proposition G.1.* First, we prove 1. Assume that  $\max_k 2\eta_{t-1,k}\sigma_k \leq b'$  and that  $b' \leq 1$ . Our objective is to use Lemma G.2 with  $\lambda = 0$ . To this end, let  $\varphi' = \frac{e^{b'} - b' - 1}{\frac{1}{2}b'^2} \geq 1$ ,  $c'_1 = \frac{b'^2 \varphi'^2}{8(\varphi' - 1)}$ , and  $c'_2 = \frac{\varphi'^4 b'^2}{8(\varphi' - 1)^2} - \frac{\varphi'^3 b'^2}{8(\varphi' - 1)}$  be as in Lemma G.2. Since we assumed that  $b \leq 1$ , we have that  $c'_1 \leq 1/2$ , and we can conclude that

$$\Delta v_t \leq \frac{\varphi'}{2} \Delta s_{t,0} + \frac{1}{2} \frac{c'_2 \Delta s_{t,0}^2}{1 - c'_1 \Delta s_{t,0}}$$

with  $\Delta s_{t,0} = \frac{\langle \tilde{\mathbf{w}}_t, \ell_t^2 \rangle}{\langle \tilde{\mathbf{w}}_t, \sigma^2 \rangle} \leq 1$ . Use this to conclude that

$$\Delta v_t \leq \frac{\varphi'}{2} + \frac{1}{2} \frac{c'_2}{1 - c'_1}.$$

This last display is exactly our first claim once we set  $c_0 = \frac{\varphi'}{2} + \frac{1}{2} \frac{c'_2}{1 - c'_1}$ . The value of  $c'_0$  depends monotonically on that of  $b'$ . Compute the value of  $c'_0$  for  $b' = 1$  to confirm that  $c'_0 \leq 3.1$ .

We now turn our attention to the second claim. We proceed in a similar fashion as before. Assume that  $\max_k 2\eta_{t-1,k}\sigma_{\max} \leq b$  for some  $b \geq 1$ . Let  $\varphi$ ,  $c_1$ ,  $c_2$  be defined as before but now in terms of  $b$ . Use Lemma G.2 to obtain that

$$\Delta v_t \leq \frac{\varphi}{2} \Delta s_t + \frac{1}{2} \frac{c_2 \Delta s_t^2}{1 - c_1 \Delta s_t}$$

with  $\Delta s_t = \frac{\text{var}_{\tilde{\mathbf{w}}}(\ell_t)}{\langle \tilde{\mathbf{w}}_t, \sigma^2 \rangle} \leq 1$ . Use this to conclude that

$$\Delta v_t \leq \frac{\varphi}{2} \Delta s_t + \frac{1}{2} \frac{c_2}{1 - c_1} \Delta s_t^2.$$

This is exactly the second claim up to a redefinition of constants. The ‘‘consequently’’ part of the claim follows from the observation that  $\Delta s_t^2 \leq \Delta s_t$  and a summation over time. The computation of the upper bound on the constants is similar as before.  $\square$



**Lemma G.2.** Let  $t \geq 1$ ,  $\lambda \in \mathbb{R}$ , and let

$$\Delta s_t = \Delta s_t(\lambda) = \frac{\langle \tilde{\mathbf{w}}_t, (\ell_t - \lambda)^2 \rangle}{\langle \tilde{\mathbf{w}}_t, \boldsymbol{\sigma}^2 \rangle} \quad (48)$$

with  $\tilde{w}_{t,k} \propto w_{t,k} \eta_{t-1,k}$ . Then, whenever  $\max_k \eta_{t-1,k} (\ell_{k,t} - \lambda) \leq b$  and  $\max_k (2\eta_{t-1,k} \sigma_k) \leq b$  for some  $b \geq 0$ , we have that

$$\Delta v_t \leq \frac{\varphi}{2} \Delta s_t + c_1 \Delta v_t \Delta s_t + \frac{1}{2} c_2 \Delta s_t^2, \quad (49)$$

where  $\varphi = \frac{e^b - b - 1}{\frac{1}{2}b^2} \geq 1$ ,  $c_1 = \frac{b^2 \varphi^2}{8(\varphi - 1)}$ , and  $c_2 = \frac{\varphi^4 b^2}{8(\varphi - 1)^2} - \frac{\varphi^3 b^2}{8(\varphi - 1)}$ . If additionally  $c_1 \Delta v_t < 1$ , then

$$\Delta v_t \leq \frac{\varphi}{2} \Delta s_t + \frac{1}{2} \frac{c_2 \Delta s_t^2}{1 - c_1 \Delta s_t}. \quad (50)$$

*Proof.* Let  $t \geq 1$ . First note that if  $c_1 \Delta s_t \geq 1$ , our claim becomes trivial. We can safely assume that that  $c_1 \Delta s_t < 1$ . We proceed in the following steps. Use Lemma F.6 to express the increase in the potential function  $\Delta \Phi_t(\Delta v) = \Phi(\mathbf{R}_t - \boldsymbol{\mu}_{t-1} - \boldsymbol{\eta} \boldsymbol{\sigma}^2 \Delta v, \boldsymbol{\eta}_{t-1}) - \Phi(\mathbf{R}_t - \boldsymbol{\mu}_t, \boldsymbol{\eta}_{t-1})$  in dual form as

$$\Delta \Phi_t(\Delta v) = \inf_{\lambda \in \mathbb{R}} \sum_{k \in K} w_{t,k} \left( \frac{e^{-\eta_{t-1,k}(\ell_{t,k} - \lambda) - \eta_{t-1,k}^2 \sigma_k^2 \Delta v} + \eta_{t-1,k}(\ell_{t,k} - \lambda) - 1}{\eta_{t-1,k}} \right).$$

From now and until the end of the proof, omit the time indexes for readability.

Because of our assumption that  $\eta_k |\ell_k - \lambda| \leq b$ , Lemma F.5 can be used to obtain that

$$\Delta \Phi(\Delta v) \leq \frac{1}{2} \varphi \sum_{k \in K} w_k [\eta_k (\ell_k - \lambda)^2] - \sum_{k \in K} w_k \left( \frac{g^{-1}(\eta_k^2 \sigma_k^2 \Delta v)}{\eta_k} \right)$$

where  $g(x) = x + h(cx)$ ,  $h(u) = \frac{1}{2} \frac{u^2}{1-u}$  and  $c = \varphi/(\varphi - 1)$ . Use the concavity of  $x \mapsto g^{-1}(\Delta v x)/x$  and Jensen's inequality to deduce that

$$\begin{aligned} \sum_{k \in K} w_k \left( \frac{g^{-1}(\eta_k^2 \sigma_k^2 \Delta v)}{\eta_k} \right) &= \sum_{k \in K} w_k \left( \eta_k \sigma_k^2 \frac{g^{-1}(\eta_k^2 \sigma_k^2 \Delta v)}{\eta_k^2 \sigma_k^2} \right) \\ &\geq \langle \mathbf{w}, \boldsymbol{\eta} \boldsymbol{\sigma}^2 \rangle \frac{g^{-1}(\Delta v \langle \hat{\mathbf{w}}, \boldsymbol{\eta}^2 \boldsymbol{\sigma}^2 \rangle)}{\langle \hat{\mathbf{w}}, \boldsymbol{\eta}^2 \boldsymbol{\sigma}^2 \rangle}, \end{aligned}$$

where we defined  $\hat{w}_k \propto w_k \eta_k \sigma_k^2$ . This is useful for obtaining the bound

$$\Delta \Phi(\Delta v) \leq \frac{1}{2} \varphi \sum_{k \in K} w_k (\eta_k (\ell_k - \lambda)^2) - \langle \mathbf{w}, \boldsymbol{\eta} \boldsymbol{\sigma}^2 \rangle \frac{g^{-1}(\Delta v \langle \hat{\mathbf{w}}, \boldsymbol{\eta}^2 \boldsymbol{\sigma}^2 \rangle)}{\langle \hat{\mathbf{w}}, \boldsymbol{\eta}^2 \boldsymbol{\sigma}^2 \rangle}.$$

Consequently,  $\Delta \Phi(\Delta v^*) \leq 0$  for

$$\Delta v^* = \frac{1}{\langle \hat{\mathbf{w}}, \boldsymbol{\eta}^2 \boldsymbol{\sigma}^2 \rangle} g \left( \frac{1}{2} \varphi \langle \hat{\mathbf{w}}, \boldsymbol{\eta}^2 \boldsymbol{\sigma}^2 \rangle \frac{\langle \tilde{\mathbf{w}}, (\ell - \lambda)^2 \rangle}{\langle \tilde{\mathbf{w}}, \boldsymbol{\sigma}^2 \rangle} \right),$$

where  $\tilde{w}_k \propto w_k \eta_k$ . Use the definition of  $\Delta v$  and the continuity of  $\Delta \Phi$  to conclude that  $\Delta v \leq \Delta v^*$ . Unpack the definition of  $g$  to obtain that

$$\Delta v \leq \frac{1}{2} \varphi \Delta s + \frac{1}{2} \frac{\langle \hat{\mathbf{w}}, \boldsymbol{\eta}^2 \boldsymbol{\sigma}^2 \rangle (c' \Delta s)^2}{1 - c' \langle \hat{\mathbf{w}}, \boldsymbol{\eta}^2 \boldsymbol{\sigma}^2 \rangle \Delta s}$$

with  $c' = \frac{1}{2} \frac{\varphi^2}{\varphi - 1}$ . Next, we will use that  $\langle \hat{\mathbf{w}}, \boldsymbol{\eta}^2 \boldsymbol{\sigma}^2 \rangle \leq \frac{1}{4} b^2$  to bound further  $\Delta v$ . Use this observation and the definition of  $c_1$  to deduce the inequality  $\langle \hat{\mathbf{w}}, \boldsymbol{\eta}^2 \boldsymbol{\sigma}^2 \rangle c' \Delta s \leq c_1 \Delta s < 1$ . Plug this in the previous display and rearrange to obtain the result:

$$\Delta v \leq \frac{1}{2} \varphi \Delta s + \frac{1}{2} \Delta s^2 \left( \frac{1}{4} c'^2 b^2 - \frac{1}{4} \varphi c' b^2 \right) + \frac{1}{4} c' b^2 \Delta v \Delta s,$$

exactly what we claimed.  $\square$
